# Supplementary material
Source: Springer Nature journal article supplement (https://www.springermedizin.de/resource/supplementary/12955_2010_792_MOESM2_ESM.pdf/9561258)

a.

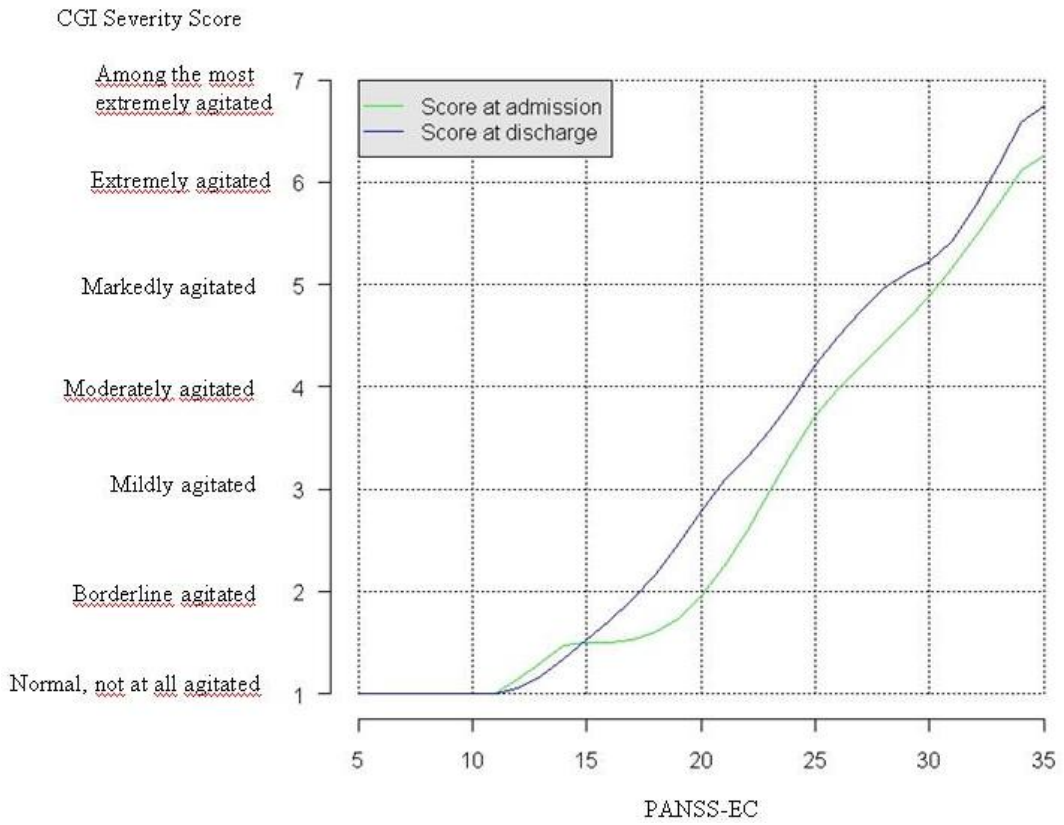

b.

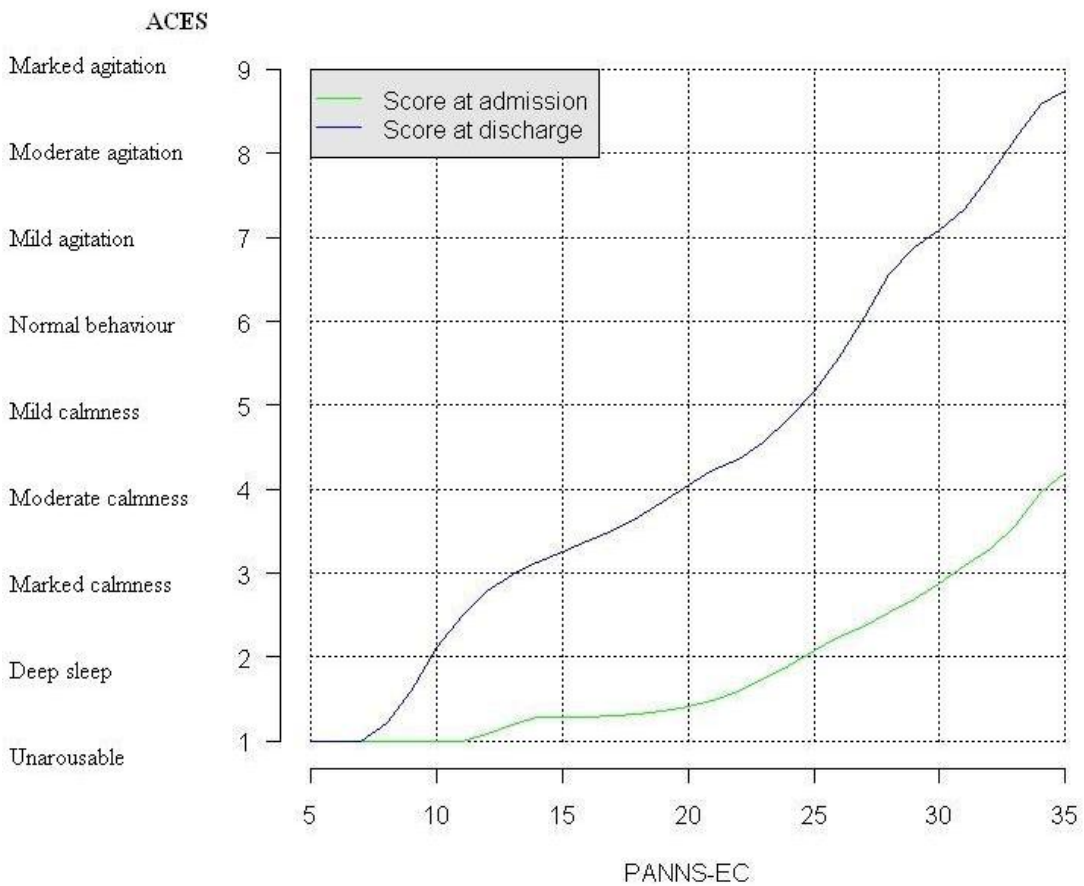

Supplement: MOESM2 [file 9561258]
